# Supplementary material for: Increased Risk of Vitamin D Deficiency Among HIV-Infected Individuals: A Systematic Review and Meta-Analysis
Source: PubMed Central journal article supplement (PMC8418196; doi:10.3389/fnut.2021.722032), 2021-08-18
Supplement: Data_Sheet_1.pdf [file Data_Sheet_1.pdf]

**Table S1 Search Strategy used in four databases**

|                                                                                                                                                                                                                                                                                                                                           |
|-------------------------------------------------------------------------------------------------------------------------------------------------------------------------------------------------------------------------------------------------------------------------------------------------------------------------------------------|
| <b>Literature search strategy in PubMed: 789</b>                                                                                                                                                                                                                                                                                          |
| 1: "HIV"[MeSH Terms] OR "HIV Infections"[MeSH Terms] OR "hiv infection"[Title/Abstract] OR "human immunodeficiency virus"[Title/Abstract] OR "aids virus"[Title/Abstract] OR "acquired immune deficiency syndrome virus"[Title/Abstract] OR "acquired immunodeficiency syndrome"[Title/Abstract] OR "HIV"[Title/Abstract]                 |
| 2: "Vitamin D Deficiency"[MeSH Terms] OR "Vitamin D"[MeSH Terms] OR "Vitamin D"[Title/Abstract] OR "25 hydroxyvitamin d"[Title/Abstract] OR "1,25 dihydroxyvitamin d"[Title/Abstract] OR "Vitamin D Deficiency"[Title/Abstract] OR "Ergocalciferols"[Title/Abstract] OR "Calcifediol"[Title/Abstract] OR "Cholecalcifero"[Title/Abstract] |
| 3: 1 AND 2                                                                                                                                                                                                                                                                                                                                |
| <b>Literature search strategy in Web of Science: 721</b>                                                                                                                                                                                                                                                                                  |
| 1: Search TS = (HIV) OR (Human Immunodeficiency Virus) OR (AIDS Virus) OR (Acquired Immune Deficiency Syndrome Virus) OR (Acquired Immunodeficiency Syndrome) OR (hiv infection)                                                                                                                                                          |
| 2: Search TS = (Vitamin D) OR (Vitamin D Deficiency) OR (25 hydroxyvitamin d) OR (1,25 dihydroxyvitamin d) OR (Ergocalciferols) OR (Calcifediol) OR (Cholecalciferol)                                                                                                                                                                     |
| 3: 1 AND 2                                                                                                                                                                                                                                                                                                                                |
| 5: Exclude (LETTER OR EDITORIAL MATERIAL OR NOTE OR REVIEW OR BOOK CHAPTER OR CORRECTION OR BOOK OR MEETING ABSTRACT OR PROCEEDINGS PAPER OR EARLY ACCESS)                                                                                                                                                                                |
| <b>Literature search strategy in EMBASE: 3134 (1717)</b>                                                                                                                                                                                                                                                                                  |
| 1: 'hiv infection':ti,ab,kw OR 'human immunodeficiency virus':ti,ab,kw OR 'aids virus':ti,ab,kw OR 'acquired immune deficiency syndrome virus':ti,ab,kw OR 'acquired immunodeficiency syndrome':ti,ab,kw OR hiv:ti,ab,kw                                                                                                                  |
| 2: 'human immunodeficiency virus'/exp;                                                                                                                                                                                                                                                                                                    |
| 3: 'human immunodeficiency virus infection'/exp                                                                                                                                                                                                                                                                                           |
| 4: 1 OR 2 OR 3                                                                                                                                                                                                                                                                                                                            |
| 5:'vitamin d':ti,ab,kw OR '25 hydroxyvitamin d':ti,ab,kw OR '1,25 dihydroxyvitamin d':ti,ab,kw OR 'vitamin d deficiency':ti,ab,kw OR ergocalciferols:ti,ab,kw OR calcifediol:ti,ab,kw OR cholecalcifero:ti,ab,kw                                                                                                                          |
| 6: 'vitamin d'/exp                                                                                                                                                                                                                                                                                                                        |
| 7: 'vitamin d deficiency'/exp                                                                                                                                                                                                                                                                                                             |
| 8: 5 OR 6 OR 7 OR                                                                                                                                                                                                                                                                                                                         |
| 9: 4 AND 8                                                                                                                                                                                                                                                                                                                                |

|                                                                                                                                                                                                                          |
|--------------------------------------------------------------------------------------------------------------------------------------------------------------------------------------------------------------------------|
| Exclude ([conference abstract]/lim OR [conference paper]/lim OR [conference review]/lim OR [letter]/lim OR [note]/lim OR [review]/lim)                                                                                   |
| <b>Literature search strategy in Cochrane library: 294</b>                                                                                                                                                               |
| 1: hiv:ti,ab,kw OR 'human immunodeficiency virus':ti,ab,kw OR 'aids virus':ti,ab,kw OR 'acquired immune deficiency syndrome virus':ti,ab,kw OR 'acquired immunodeficiency syndrome':ti,ab,kw OR 'hiv infection':ti,ab,kw |
| 2: <b>MeSH descriptor [HIV] OR MeSH descriptor [HIV infection]</b>                                                                                                                                                       |
| 3: 1 OR 2                                                                                                                                                                                                                |
| 4: 'vitamin d':ti,ab,kw OR '25 hydroxyvitamin d':ti,ab,kw OR '1,25 dihydroxyvitamin d':ti,ab,kw OR 'Vitamin D Deficiency':ti,ab,kw OR 'Ergocalciferols':ti,ab,kw OR 'Calcifediol':ti,ab,kw OR 'Cholecalcifero':ti,ab,kw  |
| 5: <b>MeSH descriptor [Vitamin D] OR MeSH descriptor [Vitamin D deficiency]</b>                                                                                                                                          |
| 6: 4 OR 5                                                                                                                                                                                                                |
| 7: 3 AND 6                                                                                                                                                                                                               |

**Table S2** subgroup analysis of VDD prevalence deference between HIV and control groups

| Subgroup category  | Number | Point estimate(95%CI) | P      | I <sup>2</sup> | T <sup>2</sup> | P      |
|--------------------|--------|-----------------------|--------|----------------|----------------|--------|
| Age>40             | 7      | 1.647(1.020-2.659)    | 0.041  | 94.568         | 0.332          | <0.001 |
| Age≤40             | 4      | 1.217(0.712-2.080)    | 0.474  | 49.552         | 0.146          | 0.114  |
| BMI>25             | 5      | 1.057(0.556-2.011)    | 0.865  | 94.757         | 0.457          | <0.001 |
| BMI≤25             | 2      | 2.120(1.122-4.008)    | 0.021  | 0.000          | 0.000          | 0.988  |
| latitude>40        | 3      | 1.331(0.695-2.549)    | 0.388  | 37.828         | 0.125          | 0.200  |
| latitude≤40        | 7      | 1.805(1.373-2.372)    | <0.001 | 74.576         | 0.070          | 0.001  |
| CD4count>500       | 5      | 1.493(0.858-2.596)    | 0.156  | 82.646         | 0.290          | <0.001 |
| CD4count≤500       | 5      | 1.322(0.681-2.566)    | 0.409  | 94.401         | 0.475          | <0.001 |
| Sex(female)        | 1      | 0.585(0.468-0.731)    | <0.001 | 0.000          | 0.000          | 1.000  |
| Sex(male)          | 2      | 2.120(1.122-4.008)    | 0.021  | 0.000          | 0.000          | 0.998  |
| ART-experienced    | 3      | 2.296(1.287-0.497)    | 0.005  | 19.927         | 0.053          | 0.287  |
| ART-naive          | 2      | 1.177(0.379-3.657)    | 0.778  | 62.765         | 0.420          | 0.101  |
| Developed country  | 7      | 1.520(0.921-2.510)    | 0.101  | 94.723         | 0.353          | <0.001 |
| Developing country | 4      | 1.377(0.897-2.114)    | 0.144  | 42.282         | 0.079          | 0.158  |

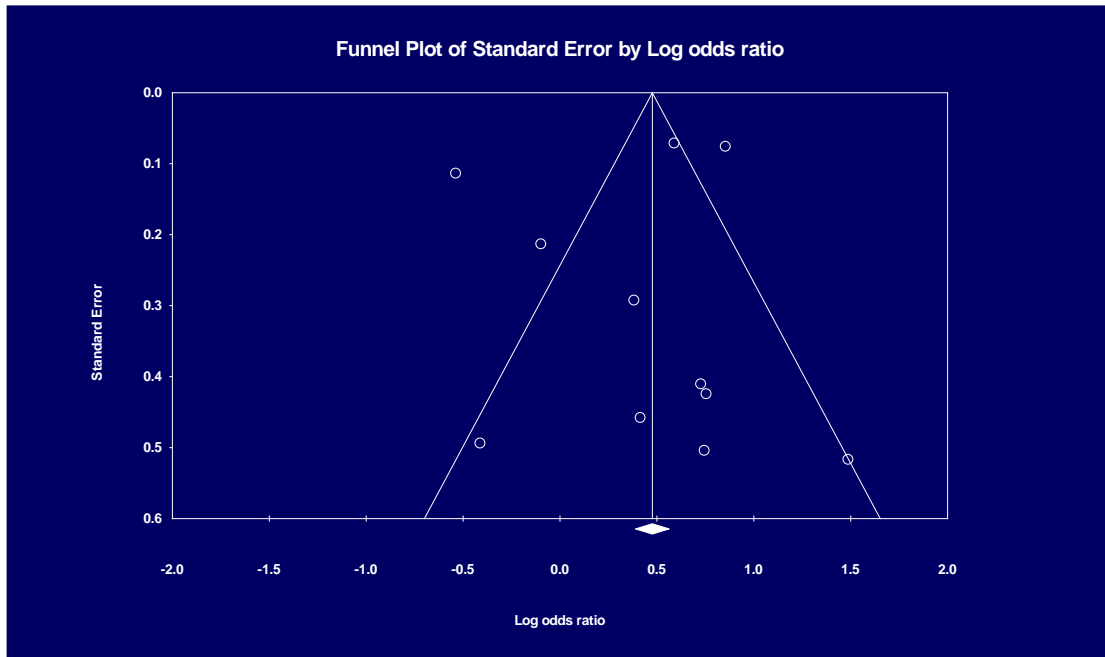

**Figure S1** funnel plot of VDD prevalence difference between HIV and control groups

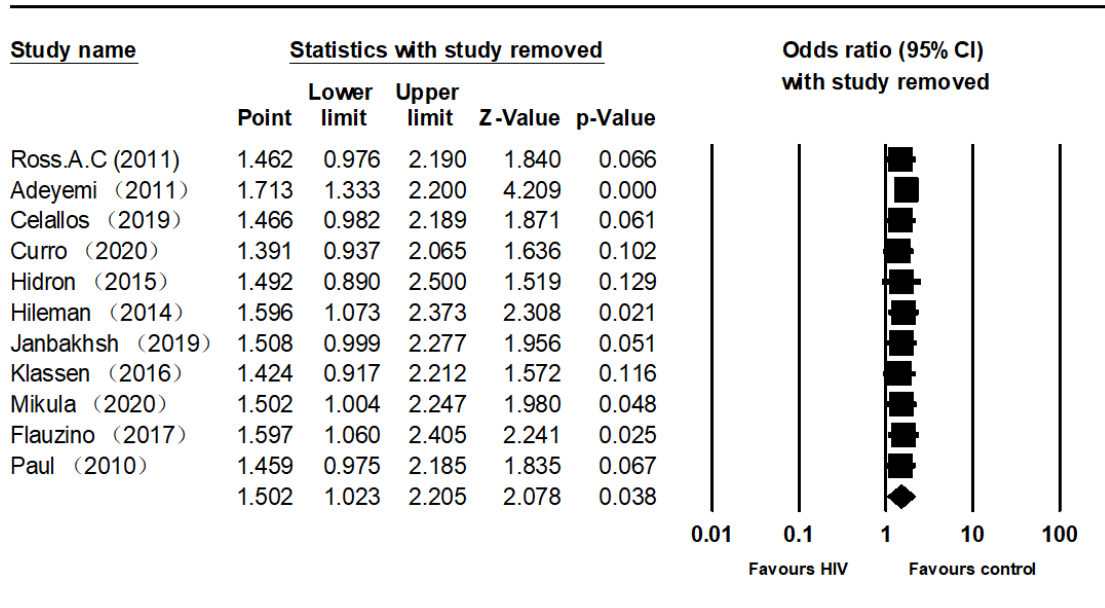

Vitamin D deficiency prevalence

**Figure S2** sensitivity analysis of included 11 studies

**Table S3** subgroup analysis of VD levels difference between HIV and control groups

| Subgroup category    | Number | Point estimate(95%CI) | P      | I <sup>2</sup> | T <sup>2</sup> | P      |
|----------------------|--------|-----------------------|--------|----------------|----------------|--------|
| Age>40               | 8      | -2.849(-7.496-1.797)  | 0.229  | 99.437         | 42.231         | <0.001 |
| Age≤40               | 6      | -1.764(-3.341--0.187) | 0.028  | 27.956         | 1.071          | 0.225  |
| BMI>25               | 5      | 1.201(-1.407-3.810)   | 0.367  | 94.040         | 6.989          | <0.001 |
| BMI≤25               | 4      | -6.149(-14.103-1.804) | 0.130  | 97.091         | 63.598         | <0.001 |
| latitude>40          | 3      | 1.188(-4.044-6.420)   | 0.656  | 91.061         | 18.770         | <0.001 |
| latitude≤40          | 8      | -4.841(-9.515--0.167) | 0.042  | 97.326         | 42.293         | <0.001 |
| Undetectable HIV RNA | 1      | -0.320(-5.116-4.476)  | 0.896  | 0.000          | 0.000          | 1.000  |
| Detectable HIV RNA   | 2      | -2.473(-4.812--0.134) | 0.038  | 0.000          | 0.000          | 0.577  |
| Sex(female)          | 1      | 2.000(0.936-3.064)    | <0.001 | 0.000          | 0.000          | 1.000  |
| Sex(male)            | 3      | -1.340(-3.884-1.205)  | 0.302  | 65.881         | 3.307          | 0.053  |
| ART-experienced      | 4      | -0.918(-5.457-3.621)  | 0.692  | 96.633         | 18.722         | <0.001 |
| ART-naive            | 3      | -2.684(-4.588--0.780) | 0.006  | 0.000          | 0.000          | 0.817  |
| Developed country    | 9      | -2.983(-7.336-1.369)  | 0.179  | 99.366         | 41.797         | <0.001 |
| Developing country   | 5      | -1.618(-3.514-0.279)  | 0.095  | 37.175         | 1.695          | 0.173  |

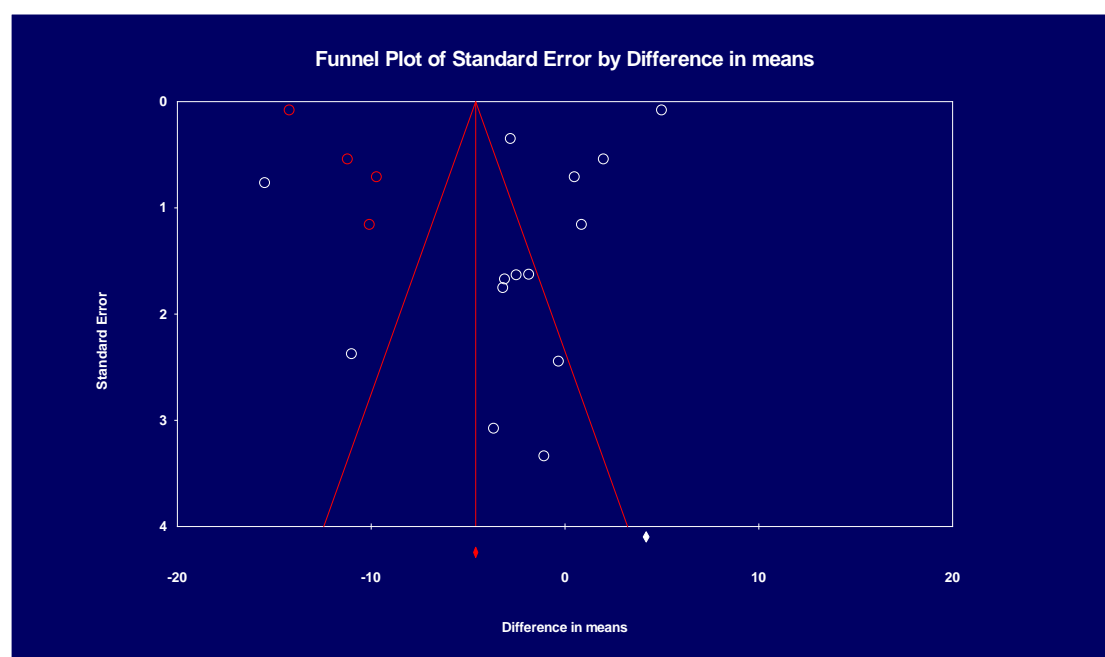

**Figure S3** funnel plot of VD levels difference between HIV and control groups

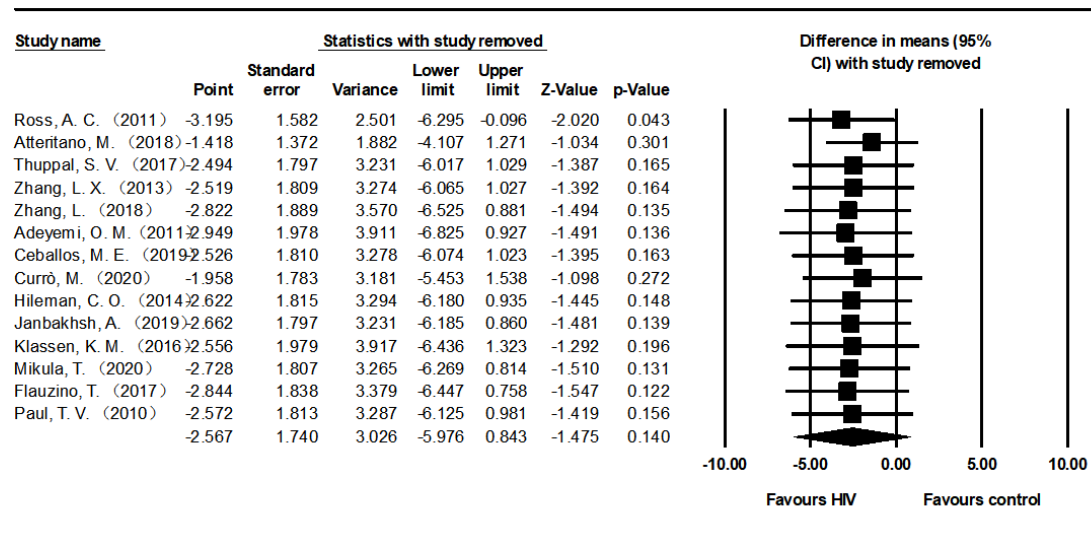

**Figure S4** sensitivity analysis of included 14 studies

**Table S4** Meta-regression for heterogeneity

| Moderators                            | Number | I <sup>2</sup> | P      | Variance explained (%) |
|---------------------------------------|--------|----------------|--------|------------------------|
| Studies for evaluating VDD prevalence |        |                |        |                        |
| Continuous                            |        |                |        |                        |
| Male proportion                       | 11     | 91.8           | <0.001 | 30                     |
| BMI                                   | 7      | 92.37          | <0.001 | 52                     |
| Undetectable HIV                      | 7      | 94.89          | <0.001 | 7                      |
| RNA proportion                        |        |                |        |                        |
| Studies for evaluating VD level       |        |                |        |                        |
| Categorical                           |        |                |        |                        |
| ART                                   | 14     | 99.02          | <0.001 | 20                     |
| latitude                              | 14     | 99.22          | <0.001 | 28                     |
| BMI                                   | 9      | 99.03          | <0.001 | 73                     |
| CD4 count                             | 14     | 99.02          | <0.001 | 40                     |
| Continuous                            |        |                |        |                        |
| Undetectable HIV                      | 7      | 98.89          | <0.001 | 31                     |
| RNA proportion                        |        |                |        |                        |
| Publication year                      | 14     | 99.02          | <0.001 | 52                     |
